# Supplementary material for: Chromatin-regulating genes are associated with postoperative prognosis and isocitrate dehydrogenase mutation in astrocytoma
Source: PubMed Central journal article supplement — Ann Transl Med. 2020 Dec;8(23):1594. doi: 10.21037/atm-20-7229 (PMC7791220; doi:10.21037/atm-20-7229), 2020-12
Supplement: atm-08-23-1594-supplementary.pdf [file atm-08-23-1594-supplementary.pdf]

**Box S1** Genes included for assessment in the current study

|                 |                  |                |
|-----------------|------------------|----------------|
| <i>BMI1</i>     | <i>RBBP5</i>     | <i>HDAC6</i>   |
| <i>BABAM1</i>   | <i>NSD1</i>      | <i>KAT5</i>    |
| <i>CHD8</i>     | <i>SMARCAD1</i>  | <i>EYA3</i>    |
| <i>BRD1</i>     | <i>SUV39H2</i>   | <i>KDM2B</i>   |
| <i>ATRX</i>     | <i>SMARCB1</i>   | <i>PRMT7</i>   |
| <i>BPTF</i>     | <i>NAA60</i>     | <i>EZH2</i>    |
| <i>BCORL1</i>   | <i>SATB2</i>     | <i>DOT1L</i>   |
| <i>CBX4</i>     | <i>SMARCA1</i>   | <i>ING4</i>    |
| <i>CHD4</i>     | <i>SMARCA4</i>   | <i>RNF40</i>   |
| <i>PRKAA1</i>   | <i>SATB1</i>     | <i>BCOR</i>    |
| <i>BRD2</i>     | <i>TBL1XR1</i>   | <i>BRPF3</i>   |
| <i>CBX2</i>     | <i>PRDM5</i>     | <i>EHMT1</i>   |
| <i>ABRAXAS1</i> | <i>SUV39H1</i>   | <i>HNRNPU</i>  |
| <i>BAP1</i>     | <i>PRDM9</i>     | <i>SS18L1</i>  |
| <i>BRD3</i>     | <i>HDAC9</i>     | <i>DMAP1</i>   |
| <i>ACTL6A</i>   | <i>KMT2A</i>     | <i>FOXA3</i>   |
| <i>CABIN1</i>   | <i>KANSL1</i>    | <i>GF11B</i>   |
| <i>CECR2</i>    | <i>KMT5B</i>     | <i>HDAC3</i>   |
| <i>BRD9</i>     | <i>KDM6B</i>     | <i>HDAC11</i>  |
| <i>BRPF1</i>    | <i>KDM4E</i>     | <i>HDAC4</i>   |
| <i>BRD8</i>     | <i>KDM2A</i>     | <i>HDAC5</i>   |
| <i>CHD2</i>     | <i>LOXL2</i>     | <i>CBX7</i>    |
| <i>TRIM28</i>   | <i>PHF19</i>     | <i>DAXX</i>    |
| <i>SMARCD1</i>  | <i>MYSM1</i>     | <i>HDAC8</i>   |
| <i>SMARCC1</i>  | <i>PHF1</i>      | <i>BUD23</i>   |
| <i>SETD7</i>    | <i>OGT</i>       | <i>EP400</i>   |
| <i>SMARCA5</i>  | <i>KDM1B</i>     | <i>ASH1L</i>   |
| <i>TET1</i>     | <i>NSD3</i>      | <i>DPF3</i>    |
| <i>TET2</i>     | <i>PHF8</i>      | <i>EMSY</i>    |
| <i>TLK1</i>     | <i>HDAC7</i>     | <i>FOXA1</i>   |
| <i>TRRAP</i>    | <i>MSL3P1</i>    | <i>BANP</i>    |
| <i>HDAC2</i>    | <i>NPM2</i>      | <i>BEND3</i>   |
| <i>HMGN5</i>    | <i>ARID4A</i>    | <i>BRDT</i>    |
| <i>RUVBL2</i>   | <i>KMT2E</i>     | <i>UBN1</i>    |
| <i>PRDM6</i>    | <i>NSD2</i>      | <i>USP21</i>   |
| <i>RIOX1</i>    | <i>PKN1</i>      | <i>VPS72</i>   |
| <i>RSBN1</i>    | <i>JMJD6</i>     | <i>ZMYND11</i> |
| <i>RBBP4</i>    | <i>PBRM1</i>     | <i>CTCF</i>    |
| <i>RING1</i>    | <i>EYA2</i>      | <i>AEBP2</i>   |
| <i>PHF20</i>    | <i>KANSL3</i>    | <i>ENY2</i>    |
| <i>RAG1</i>     | <i>KAT7</i>      | <i>EYA4</i>    |
| <i>RUVBL1</i>   | <i>KAT8</i>      | <i>DNMT3A</i>  |
| <i>SETDB2</i>   | <i>PRMT6</i>     | <i>EED</i>     |
| <i>RCOR1</i>    | <i>PRKCB</i>     | <i>CARM1</i>   |
| <i>RBL2</i>     | <i>KDM4B</i>     | <i>CHD6</i>    |
| <i>RCCD1</i>    | <i>KDM5B</i>     | <i>DNMT1</i>   |
| <i>MTF2</i>     | <i>KAT6B</i>     | <i>ATXN7L3</i> |
| <i>L3MBTL1</i>  | <i>MEN1</i>      | <i>EHMT2</i>   |
| <i>RBBP7</i>    | <i>ARID4B</i>    | <i>EYA1</i>    |
| <i>KDM4C</i>    | <i>KDM5D</i>     | <i>EZH1</i>    |
| <i>L3MBTL3</i>  | <i>KDM4A</i>     | <i>DNAJC2</i>  |
| <i>METTL4</i>   | <i>MORF4L1</i>   | <i>DEK</i>     |
| <i>JMJD1C</i>   | <i>ALKBH4</i>    | <i>DPPA3</i>   |
| <i>KMT5C</i>    | <i>MSL3</i>      | <i>CHD5</i>    |
| <i>MRGBP</i>    | <i>EPC2</i>      | <i>CHD9</i>    |
| <i>NCOR1</i>    | <i>KAT6A</i>     | <i>ANP32E</i>  |
| <i>KMT2B</i>    | <i>ACTL6B</i>    | <i>DCAF1</i>   |
| <i>KMT2D</i>    | <i>KDM6A</i>     | <i>CBX8</i>    |
| <i>KMT2C</i>    | <i>KDM7A</i>     | <i>CHD3</i>    |
| <i>PHF21A</i>   | <i>MBTD1</i>     | <i>CHD1</i>    |
| <i>RB1</i>      | <i>MCRS1</i>     | <i>ASF1B</i>   |
| <i>RCBTB1</i>   | <i>APBB1</i>     | <i>BAG6</i>    |
| <i>JAK2</i>     | <i>ASXL1</i>     | <i>BABAM2</i>  |
| <i>MSL1</i>     | <i>ASH2L</i>     | <i>CBX6</i>    |
| <i>PHF2</i>     | <i>ASF1A</i>     | <i>CBX3</i>    |
| <i>MORF4L2</i>  | <i>MACROH2A1</i> | <i>CHD7</i>    |
| <i>HMG20B</i>   | <i>HIRA</i>      | <i>BAP18</i>   |
| <i>CTCF</i>     | <i>KDM8</i>      | <i>COPRS</i>   |
| <i>H1-9P</i>    | <i>MEAF6</i>     | <i>BRD4</i>    |
| <i>ING5</i>     | <i>HCFC1</i>     | <i>SETMAR</i>  |
| <i>ARID2</i>    | <i>MACROH2A2</i> | <i>UTY</i>     |
| <i>KDM3B</i>    | <i>HLTF</i>      | <i>SMARCD2</i> |
| <i>KDM5C</i>    | <i>LRWD1</i>     | <i>RRP8</i>    |
| <i>PHF13</i>    | <i>IKZF1</i>     | <i>RNF8</i>    |
| <i>UBE2A</i>    | <i>PRMT5</i>     | <i>UTP3</i>    |
| <i>SETDB1</i>   | <i>KMT5A</i>     | <i>SFMBT1</i>  |
| <i>SUDS3</i>    | <i>KDM5A</i>     | <i>SMARCC2</i> |
| <i>RNF168</i>   | <i>KDM3A</i>     | <i>ZNF304</i>  |
| <i>SETD2</i>    | <i>KDM1A</i>     | <i>SMARCE1</i> |
| <i>WDR5</i>     | <i>EPC1</i>      | <i>TDG</i>     |
| <i>WAC</i>      | <i>HMG20A</i>    | <i>DPF2</i>    |
| <i>RAG2</i>     | <i>L3MBTL2</i>   | <i>TOX</i>     |
| <i>TLK2</i>     | <i>PRKAA2</i>    | <i>SETD1A</i>  |
| <i>RBL1</i>     | <i>KDM4D</i>     | <i>SMYD3</i>   |
| <i>TSPYL2</i>   | <i>HASPIN</i>    | <i>TET3</i>    |
| <i>USP16</i>    | <i>ING2</i>      | <i>SPIN1</i>   |
| <i>RSF1</i>     | <i>L3MBTL4</i>   | <i>USP3</i>    |
| <i>SETD5</i>    | <i>ARID1A</i>    | <i>SUZ12</i>   |
| <i>SMARCD3</i>  | <i>BAZ2A</i>     | <i>SRCAP</i>   |
| <i>TDRD3</i>    | <i>BAHD1</i>     | <i>SMYD2</i>   |
| <i>USP22</i>    | <i>DTX3L</i>     | <i>SMCHD1</i>  |
| <i>SIRT7</i>    | <i>KANSL2</i>    | <i>UIMC1</i>   |
| <i>STPG4</i>    | <i>DAPK3</i>     | <i>USP49</i>   |
| <i>SETD1B</i>   | <i>DPY30</i>     | <i>YEATS4</i>  |
| <i>ARID1B</i>   | <i>FOXA2</i>     | <i>UHRF1</i>   |
| <i>RNF20</i>    | <i>HMGN3</i>     |                |
| <i>BRCC3</i>    | <i>ING3</i>      |                |
| <i>SGF29</i>    | <i>NR3C1</i>     |                |
| <i>PADI4</i>    | <i>JARID2</i>    |                |
| <i>PRDM7</i>    | <i>HDAC1</i>     |                |

**Table S1** Gene expressions correlated with subcluster order according to the length of prognosis

| Genes                       | Pearson correlation | P value     |
|-----------------------------|---------------------|-------------|
| Positively correlated genes |                     |             |
| <i>HDAC5</i>                | 0.61                | 1.80E-21    |
| <i>PHF1</i>                 | 0.57                | 4.18E-18    |
| <i>CCDC101</i>              | 0.56                | 1.70E-17    |
| <i>SMARCD3</i>              | 0.55                | 4.38E-17    |
| <i>EHMT2</i>                | 0.55                | 8.14E-17    |
| <i>ACTL6B</i>               | 0.54                | 1.83E-16    |
| <i>H2AFY2</i>               | 0.54                | 4.35E-16    |
| <i>DMAP1</i>                | 0.52                | 2.49E-15    |
| <i>SMARCB1</i>              | 0.52                | 3.36E-15    |
| <i>TSPYL2</i>               | 0.52                | 4.64E-15    |
| <i>VPS72</i>                | 0.50                | 3.91E-14    |
| <i>CBX7</i>                 | 0.47                | 3.06E-12    |
| <i>NPM2</i>                 | 0.47                | 3.43E-12    |
| <i>MYST1</i>                | 0.47                | 4.05E-12    |
| <i>HIRA</i>                 | 0.46                | 5.13E-12    |
| <i>KAT5</i>                 | 0.46                | 5.63E-12    |
| <i>PKN1</i>                 | 0.46                | 7.90E-12    |
| <i>HMGN5</i>                | 0.45                | 1.88E-11    |
| <i>BRD9</i>                 | 0.44                | 5.97E-11    |
| <i>ZMYND11</i>              | 0.44                | 7.08E-11    |
| <i>APBB1</i>                | 0.43                | 1.27E-10    |
| <i>WAC</i>                  | 0.41                | 1.22E-09    |
| <i>RCCD1</i>                | 0.41                | 1.67E-09    |
| <i>SMARCC2</i>              | 0.41                | 1.72151E-09 |
| Negatively correlated genes |                     |             |
| <i>PRKAA1</i>               | -0.61               | 1.11E-21    |
| <i>RBL1</i>                 | -0.60               | 5.86E-21    |
| <i>RAG1</i>                 | -0.57               | 3.68E-18    |
| <i>CHD1</i>                 | -0.55               | 7.82E-17    |
| <i>EYA4</i>                 | -0.54               | 1.27E-16    |
| <i>DTX3L</i>                | -0.53               | 5.41E-16    |
| <i>RB1</i>                  | -0.52               | 2.86E-15    |
| <i>DNMT3A</i>               | -0.51               | 1.61E-14    |
| <i>ATRX</i>                 | -0.48               | 7.67E-13    |
| <i>USP16</i>                | -0.47               | 2.14E-12    |
| <i>PRMT6</i>                | -0.47               | 2.32E-12    |
| <i>SFMBT1</i>               | -0.47               | 2.78E-12    |
| <i>MYSM1</i>                | -0.47               | 2.93E-12    |
| <i>EYA3</i>                 | -0.46               | 6.93E-12    |
| <i>TLK1</i>                 | -0.45               | 1.88E-11    |
| <i>NSD1</i>                 | -0.45               | 1.88E-11    |
| <i>ACTL6A</i>               | -0.44               | 4.84E-11    |
| <i>SMARCA5</i>              | -0.44               | 6.93E-11    |
| <i>SUZ12</i>                | -0.44               | 8.69E-11    |
| <i>HDAC9</i>                | -0.42               | 6.83E-10    |
| <i>SMARCE1</i>              | -0.42               | 7.47E-10    |
| <i>BRCC3</i>                | -0.41               | 1.12E-09    |
| <i>JAK2</i>                 | -0.41               | 1.3E-09     |
| <i>TRRAP</i>                | -0.41               | 1.86E-09    |
| <i>NCOR1</i>                | -0.40               | 2.5E-09     |
| <i>KDM5A</i>                | -0.40               | 3.24E-09    |
